# Supplementary material for: Synthesis of carbon dot based Schiff bases and selective anticancer activity in glioma cells
Source: Royal Society of Chemistry journal article supplement (doi:10.1039/d3ra06411e), 2024-01-01
Supplement: d3ra06411e1.pdf [file d3ra06411e1.pdf]

## **Synthesis of carbon dots based Schiff base and selective anticancer activity on glioma cells**

Yafeng Zhuang<sup>a,#</sup>, Liping Zhu<sup>b,c,#</sup>, Xiaoping Chen<sup>a,#</sup>, Jing Chen<sup>a</sup>, Zhoujie Ye<sup>b,c</sup>, Jie Kang<sup>a,\*</sup>, Xinrui Wang<sup>b,c,\*</sup> and Zhizhong Han<sup>a,\*</sup>

<sup>a</sup>School of Pharmacy, Fujian Medical University, Fuzhou, Fujian 350122, P R China

<sup>b</sup>Medical Research Center, Fujian Maternity and Child Health Hospital, College of Clinical Medicine for Obstetrics and Gynecology and Pediatrics, Fujian Medical University, Fuzhou 350011, Fujian, P R China

<sup>c</sup>NHC Key Laboratory of Technical Evaluation of Fertility Regulation for Non-Human Primate, Fujian Maternity and Child Health Hospital, Fuzhou 350011, Fujian, P R China

\* Corresponding authors:

E-mail: zzhan@fjmu.edu.cn (Z. Han); wanxiru@sjtu.edu.cn (X. Wang); davidkj660825@163.com (J. Kang)

# These authors contributed equally to this work

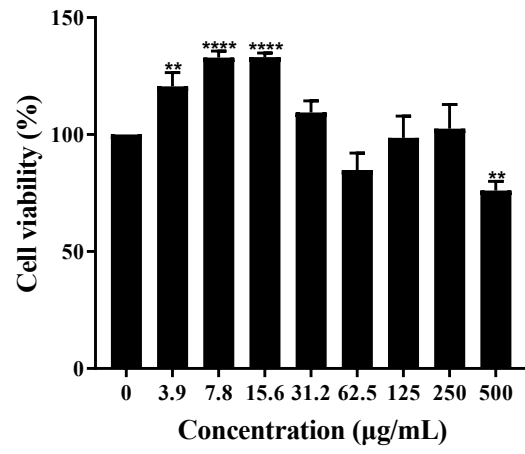

Fig. S1 MTT test results of CDSB on HeLa cells

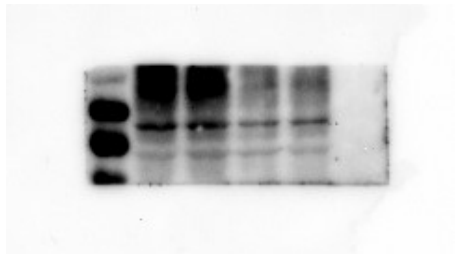

PARP

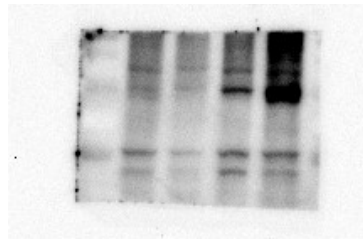

Cleaved PARP

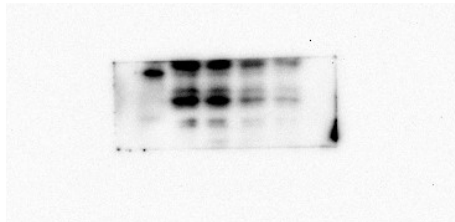

Caspas3

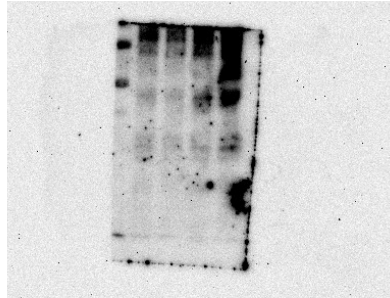

Cleaved Caspase3

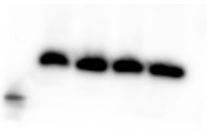

Bax

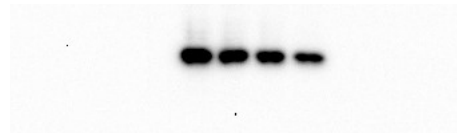

Bcl2

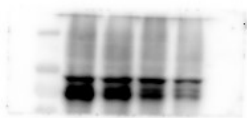

NFκB

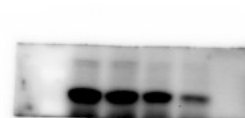

IκBα

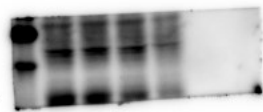

phospho IκBα

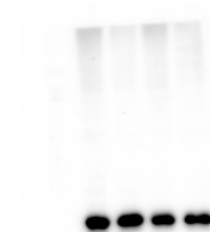

β-actin

Fig. S2 The pictures of the electrophoretic gels and blots
